# Supplementary material for: Ambipolar transistor properties of 2,2′-binaphthosemiquinones
Source: Royal Society of Chemistry journal article supplement (doi:10.1039/c4tc02467b), 2014-12-16
Supplement: c4tc02467b1.pdf [file c4tc02467b1.pdf]

## Supporting Information

### Ambipolar Transistor Properties of 2,2'-Binaphthosemiquinones

Toshiki Higashino,<sup>\*a</sup> Shohei Kumeta,<sup>a</sup> Sumika Tamura,<sup>a</sup> Yoshio Ando,<sup>b</sup> Ken Ohmori,<sup>b</sup>  
Keisuke Suzuki,<sup>b</sup> and Takehiko Mori<sup>\*ac</sup>

#### Synthesis

All chemicals and solvents were used as purchased. All reactions were carried out under ambient conditions. Column chromatography was carried out using silica gel (Wako Wakogel C-200). For thin-layer chromatography (TLC) analysis, Merck pre-coated plates (silica gel 60 F254, 0.25 mm) were used. The <sup>1</sup>H-NMR (300 MHz) spectra were recorded using a JEOL JNM-AL300 spectrometer. Chemical shifts were given in  $\delta$  values (ppm) using TMS as the internal standard. Mass spectra were taken on a Shimadzu GC-MS-QP-5000 mass spectrometer.

#### General procedures for the synthesis of 4-alkoxy-1-naphthol.<sup>9</sup>

To a solution of 1,4-naphthoquinone (1.58 g, 10.0 mmol) in methanol (20 mL) was added dropwise a solution of SnCl<sub>2</sub> (6.64 g, 35.0 mmol) in 12 M HCl (7 mL) at room temperature. The solution was refluxed for 3 hours and cooled to room temperature. Then, methanol was removed to one fifth of the starting volume and the residue was poured in cold water to give a precipitate, which was filtered and dissolved in CH<sub>2</sub>Cl<sub>2</sub>. The organic solution was dried over MgSO<sub>4</sub>, and the solvent was removed *in vacuo* to give **1a**, which was purified by silica-gel chromatography (CHCl<sub>3</sub>,  $R_f = 0.3$ ) to obtain the pure product (1.1 g, 60%) as a white solid.

#### **4-methoxy-1-naphthol (1a)**

White solid (60% yield).  $^1\text{H NMR}$  (300MHz,  $\text{CDCl}_3$ )  $\delta$  8.22 (1H, d,  $J = 9.3$  Hz, H-8), 8.11 (1H, d,  $J = 9.3$  Hz, H-5), 7.48-7.55 (2H, m, H-6 and H-7), 6.74 (1H, d,  $J = 8.1$  Hz, H-2), 6.64 (1H, d,  $J = 8.1$  Hz, H-3), 4.87 (1H, br, OH), 3.96 (3H, s,  $\text{CH}_3$ ). EI-MS  $m/z = 174$  ( $\text{M}^+$ ).

#### **4-ethoxy-1-naphthol (1b)**

By using ethanol and following the same procedure as **1a**, the ethoxy derivative was obtained as a white solid (64% yield). EI-MS  $m/z = 188$  ( $\text{M}^+$ ).

#### **4-*i*-propoxy-1-naphthol (1c)**

By using isopropyl alcohol and following the same procedure as **1a**, the *i*-propoxy derivative was obtained as a white solid (50% yield). EI-MS  $m/z = 400$  ( $\text{M}^+$ ).

#### **4-cyclohexyloxy-1-naphthol (1d)**

By using cyclohexanol and following the same procedure as **1a**, the cyclohexyloxy derivative was obtained as a white solid (42% yield). EI-MS  $m/z = 242$  ( $\text{M}^+$ ).

#### **4-*n*-hexyloxy-1-naphthol (1e)**

By using *n*-hexanol and following the same procedure as **1a**, the *n*-hexyloxy derivative was obtained as a white solid (45% yield). EI-MS  $m/z = 244$  ( $\text{M}^+$ ).

#### **General procedures for the synthesis of 4,4'-dialkoxy-2,2'-binaphthosemiquinone.**

To a solution of **1a** (0.47 g, 2.7 mmol) in  $\text{CHCl}_3$  (30 mL) was added  $\text{Ag}_2\text{O}$  (0.75 g, 3.2 mmol) at room temperature. After the mixture was stirred for 3 hours, inorganic precipitates were filtered off. The solvent was removed *in vacuo* to give **2a**, which was purified by silica-gel chromatography ( $\text{CHCl}_3$ ,  $R_f = 0.8$ ) and recrystallization from toluene to obtain the pure product (0.38 g, 83%) as needle-like black crystals.

#### **4,4'-dimethoxy-2,2'-binaphthosemiquinone (2a)**

Needle-like black crystals (83% yield).  $^1\text{H}$  NMR (300MHz,  $\text{CDCl}_3$ )  $\delta$  8.41 (2H, s, H-3), 8.17 (2H, d,  $J = 7.8$  Hz, H-8), 7.79 (2H, d,  $J = 7.8$  Hz, H-5), 7.62 (2H, t,  $J = 7.8$  Hz, H-7), 7.48 (2H, t,  $J = 7.8$  Hz, H-6), 4.08 (6H, s,  $\text{CH}_3$ ). EI-MS  $m/z = 344$  ( $\text{M}^+$ ).

#### **4,4'-diethoxy-2,2'-binaphthosemiquinone (2b)**

By using the starting material **1b** and following the same procedure as **1a**, the ethoxy species was obtained as needle-like black crystals (51% yield).  $^1\text{H}$  NMR (300MHz,  $\text{CDCl}_3$ )  $\delta$  8.40 (2H, s, H-3), 8.17 (2H, d,  $J = 7.5$  Hz, H-8), 7.84 (2H, d,  $J = 7.5$  Hz, H-5), 7.63 (2H, t,  $J = 7.5$  Hz, H-7), 7.49 (2H, t,  $J = 7.5$  Hz, H-6), 4.33 (4H, q,  $J = 6.9$  Hz,  $\text{CH}_2$ ), 1.58 (6H, t,  $J = 6.9$  Hz,  $\text{CH}_3$ ). EI-MS  $m/z = 372$  ( $\text{M}^+$ ).

#### **4,4'-di-*i*-propoxy-2,2'-binaphthosemiquinone (2c)**

By using the starting material **1c** and following the same procedure as **1a**, the *i*-propyloxy species was obtained as needle-like black crystals (43% yield).  $^1\text{H}$  NMR (300MHz,  $\text{CDCl}_3$ )  $\delta$  8.40 (2H, s, H-3), 8.16 (2H, d,  $J = 7.8$  Hz, H-8), 7.82 (2H, d,  $J = 7.8$  Hz, H-5), 7.60 (2H, t,  $J = 7.8$  Hz, H-7), 7.46 (2H, t,  $J = 7.8$  Hz, H-6), 4.95-4.87 (2H, m,  $J = 6.0$  Hz, CH), 1.52 (12H, d,  $J = 6.0$  Hz,  $\text{CH}_3$ ). EI-MS  $m/z = 400$  ( $\text{M}^+$ ).

#### **4,4'-dicyclohexyloxy-2,2'-binaphthosemiquinone (2d)**

By using the starting material **1d** and following the same procedure as **1a**, the cyclohexyloxy species was obtained as needle-like black crystals (40% yield).  $^1\text{H}$  NMR (300MHz,  $\text{CDCl}_3$ )  $\delta$  8.39 (2H, s, H-3), 8.17 (2H, d,  $J = 7.5$  Hz, H-8), 7.84 (2H, d,  $J = 7.5$  Hz, H-5), 7.61 (2H, t,  $J = 7.5$  Hz, H-7), 7.46 (2H, t,  $J = 7.5$  Hz, H-6), 4.73-4.63 (2H, m, CH), 2.15-2.05 (2H, m,  $\text{CH}_2$ ), 1.92-1.72 (4H, m,  $\text{CH}_2$ ), 1.65-1.50 (4H, m,  $\text{CH}_2$ ). EI-MS  $m/z = 480$  ( $\text{M}^+$ ).

#### **4,4'-di-*n*-hexyloxy-2,2'-binaphthosemiquinone (2e)**

By using the starting material **1e** and following the same procedure as **1a**, the *n*-hexyloxy species was obtained as needle-like black crystals (60% yield). <sup>1</sup>H NMR (300MHz, CDCl<sub>3</sub>) δ 8.38 (2H, s, H-3), 8.16 (2H, d, *J* = 7.8 Hz, H-8), 7.81 (2H, d, *J* = 7.8 Hz, H-5), 7.62 (2H, t, *J* = 7.8 Hz, H-7), 7.47 (2H, t, *J* = 7.8 Hz, H-6), 4.25 (4H, t, *J* = 6.3 Hz, CH<sub>2</sub>), 2.00-1.85 (4H, m, CH<sub>2</sub>), 1.50-1.30 (8H, m, CH<sub>2</sub>CH<sub>2</sub>), 0.94 (6H, t, *J* = 6.6 Hz, CH<sub>3</sub>). EI-MS *m/z* = 484 (M<sup>+</sup>).

### Redox and optical properties

Cyclic voltammograms were measured on an ALS model 701E electrochemical analyzer in 0.1 M tetra-*n*-butylammonium hexafluorophosphate (*n*-Bu<sub>4</sub>N·PF<sub>6</sub>) solutions of dichloromethane at a scan rate of 20, 50, and 100 mV/s. The reference electrode was Ag/AgNO<sub>3</sub> with a glassy carbon working electrode and a Pt supporting electrode. All the measured potentials were normalized assuming the ferrocene/ferrocenium redox potential to be -4.80 eV from the vacuum level.<sup>10</sup> UV/vis spectra were collected on a JASCO V-630 spectrometer in 10<sup>-5</sup> M solutions of chloroform.

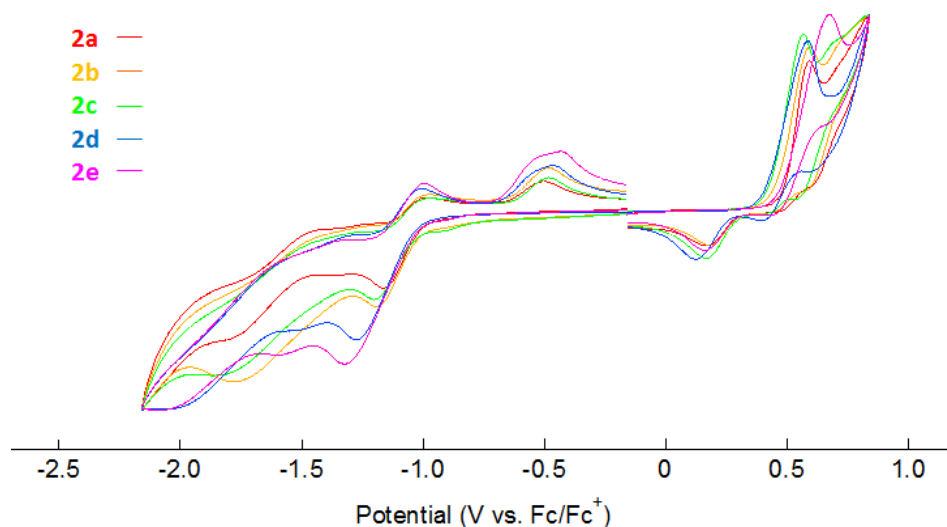

**Fig. S1** Cyclic voltammograms of **2a-e** measured at a scan rate of 100 mV/s.

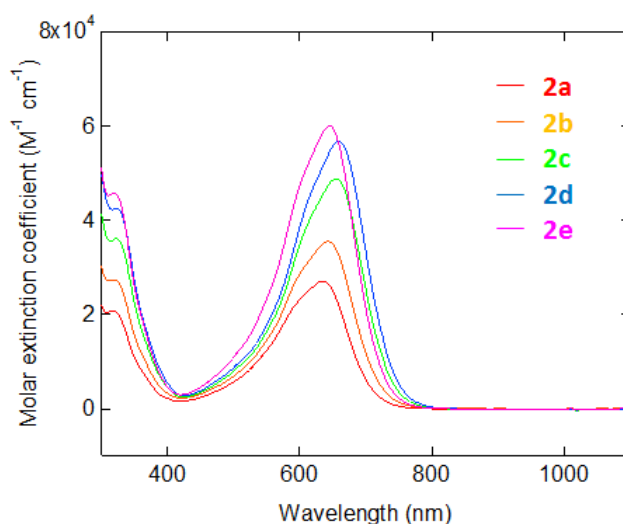

**Fig. S2** UV/vis spectra of **2a-e** measured in chloroform.

### Crystal structures and band calculations

The reflection data were collected on a Rigaku R-AXIS RAPID-II diffractometer using CuK $\alpha$  X-ray from a rotating anode source with a confocal multilayer X-ray mirror ( $\lambda = 1.54187 \text{ \AA}$ ) around 273 K. The temperature was controlled by a Rigaku cryostat system. Empirical absorption correction was applied with the ABSCOR program. The structures were solved by the direct method (SIR 2008) and refined by full-matrix least-squares by applying anisotropic temperature factors for all non-hydrogen atoms using the SHELX-97 programs.<sup>S1, S2</sup> The hydrogen atoms were placed at geometrically calculated positions. The respective intermolecular transfer integrals  $t_i$  between the HOMO-HOMO and LUMO-LUMO were calculated on the basis of the extended Hückel molecular orbital calculation and the intermolecular overlaps of HOMO and LUMO obtained from the MOPAC, AM1 molecular orbital calculation.<sup>S3, S4</sup>

## Device fabrication

Thin-film transistors were fabricated on a highly doped n-type silicon wafer with a thermally grown silicon oxide layer of 300 nm thickness ( $C = 11.5 \text{ nF/cm}^2$ ) by the following procedure. Tetratetracontane ( $\text{C}_{44}\text{H}_{90}$ , TTC,  $\epsilon = 2.5$ ) was deposited on the substrate with a thickness of 20 nm,<sup>S5</sup> where the resulting overall capacitance of the gate dielectrics was  $10.4 \text{ nF/cm}^2$ .<sup>S6</sup> The BNQ derivatives were vacuum deposited on the TTC thin-film with a thickness of 40 nm as the active layer. The top-contact electrodes were patterned by thermal deposition of Au using a shadow mask; the channel length ( $L$ ) and width ( $W$ ) were  $100 \mu\text{m}$  and  $1000 \mu\text{m}$ , respectively. The transistor characteristics were measured under the vacuum of  $10^{-4} \text{ Pa}$  by using a Keithley 4200 semiconductor parameter analyzer, and the mobility was evaluated from the transconductance in the saturated region.

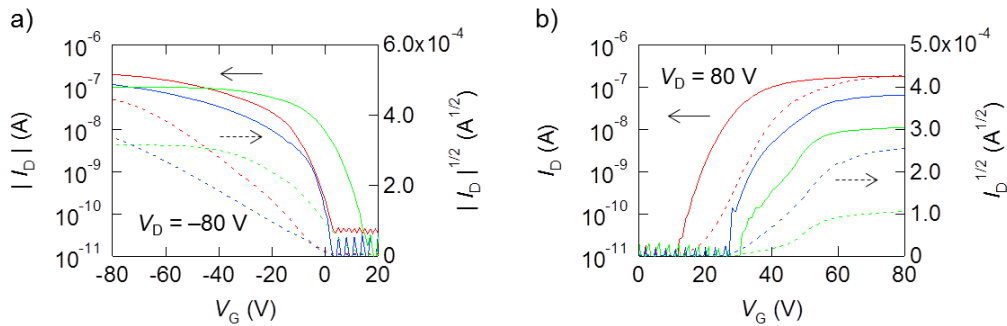

**Fig. S3** Characteristics of the ambipolar transistors based on **2a** deposited on TTC. Transfer characteristics in the (a) p-channel, and the (b) n-channel regions, measured under vacuum (red curves), after five months (blue curves), and under ambient conditions (green curves).

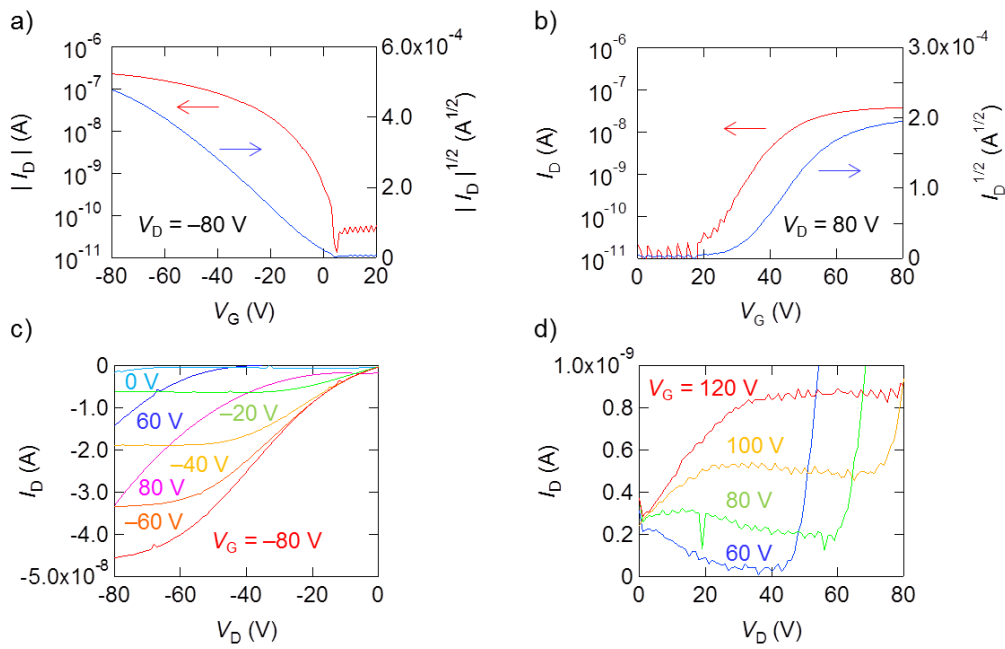

**Fig. S4** Characteristics of the ambipolar transistors based on **2a** deposited on TTC. (a) Transfer characteristics in the p-channel region, and (b) the n-channel region. (c) Output characteristics in the p-channel region, and (d) the n-channel region.

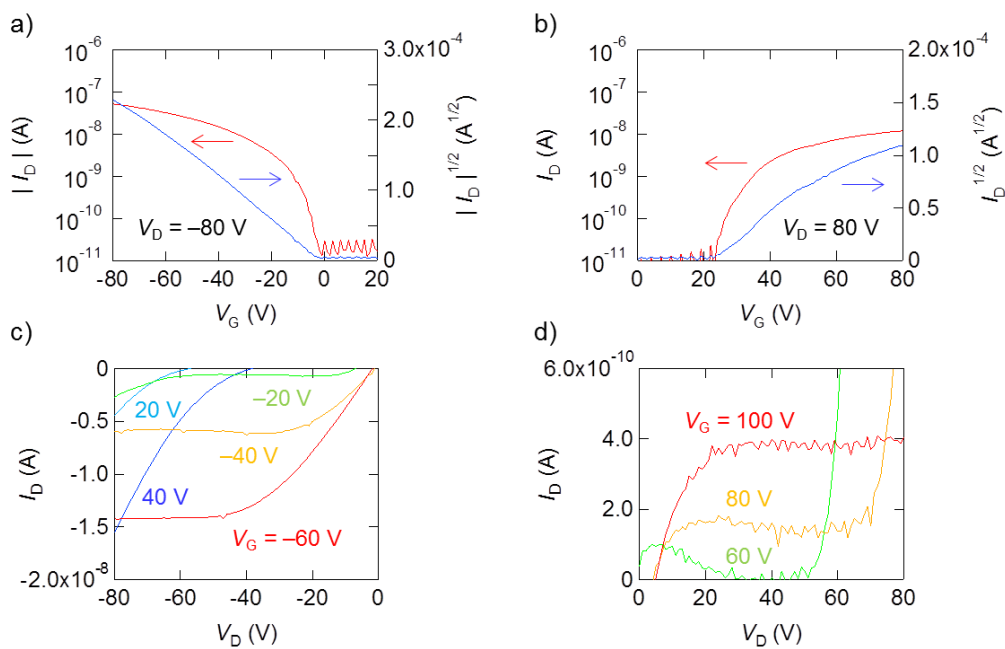

**Fig. S5** Characteristics of the ambipolar transistors based on **2c** deposited on TTC. (a) Transfer characteristics in the p-channel region, and (b) the n-channel region. (c) Output characteristics in the p-channel region, and (d) the n-channel region.

## Thin film properties

X-ray diffraction patterns of BNQs thin films (40 nm) deposited on TTC (20 nm)|SiO<sub>2</sub> substrates were obtained by a Phillips X'Pert-Pro-MRD with a monochromated CuK $\alpha$  radiation ( $\lambda = 1.541838 \text{ \AA}$ ) in air. AFM images of BNQs thin films on TTC (20 nm)|SiO<sub>2</sub> were taken by an SII scanning probe microscope system SPI3800N and SPA-300 by using an Si<sub>3</sub>N<sub>4</sub> cantilever in air.

## References

- [S1] M. C. Burla, R. Caliendo, M. Camalli, B. Carrozzini, G. L. Cascarano, L. de Caro, C. Giacovazzo, G. Polidori, D. Siliqi and R. Spagna, *J. Appl. Crystallogr.*, 2007, **40**, 609.
- [S2] G. M. Sheldrick, *Acta Crystallogr., Sect. A: Found. Crystallogr.*, 2008, **A64**, 112.
- [S3] T. Mori, A. Kobayashi, Y. Sasaki, H. Kobayashi, G. Saito and H. Inokuchi, *Bull. Chem. Soc. Jpn.*, 1984, **57**, 627.
- [S4] M. J. S. Dewar, E. G. Zoebisch, E. F. Healy and J. J. P. Stewart, *J. Am. Chem. Soc.*, 1985, **107**, 3902.
- [S5] (a) M. Kraus, S. Richler, A. Opitz, W. Brütting, S. Haas, T. Hasegawa, A. Hinderhofer and F. Schreiber, *J. Appl. Phys.*, 2010, **107**, 094503; (b) M. Kraus, S. Haug, W. Brütting and A. Opitz, *Org. Electron.*, 2011, **12**, 731.
- [S6] K.-J. Baeg, Y.-Y. Noh, J. Ghim, B. Lim and D.-Y. Kim, *Adv. Funct. Mater.*, 2008, **18**, 3678.
